# Supplementary material for: Spatio-temporal variations in bacterial and fungal community associated with dust aerosol in Kuwait
Source: PubMed Central journal article supplement (PMC7644028; doi:10.1371/journal.pone.0241283), 2020-11-05
Supplement: pone.0241283.s001.pdf [file pone.0241283.s001.pdf]

Supplementary File S1

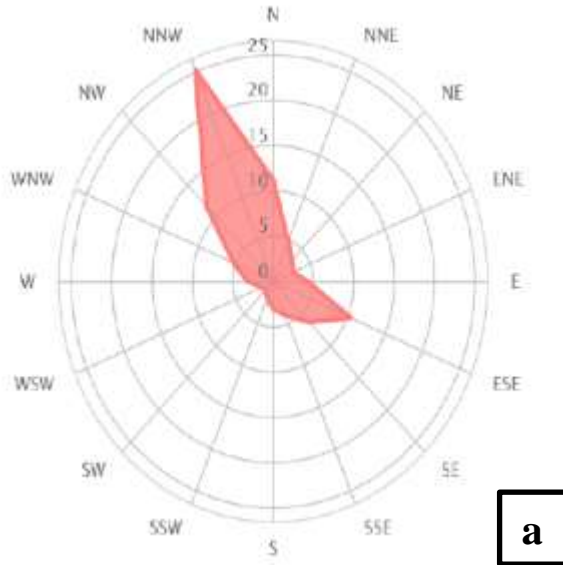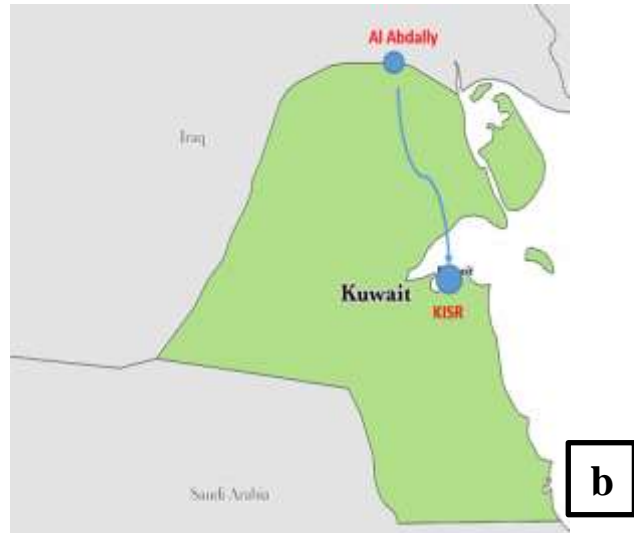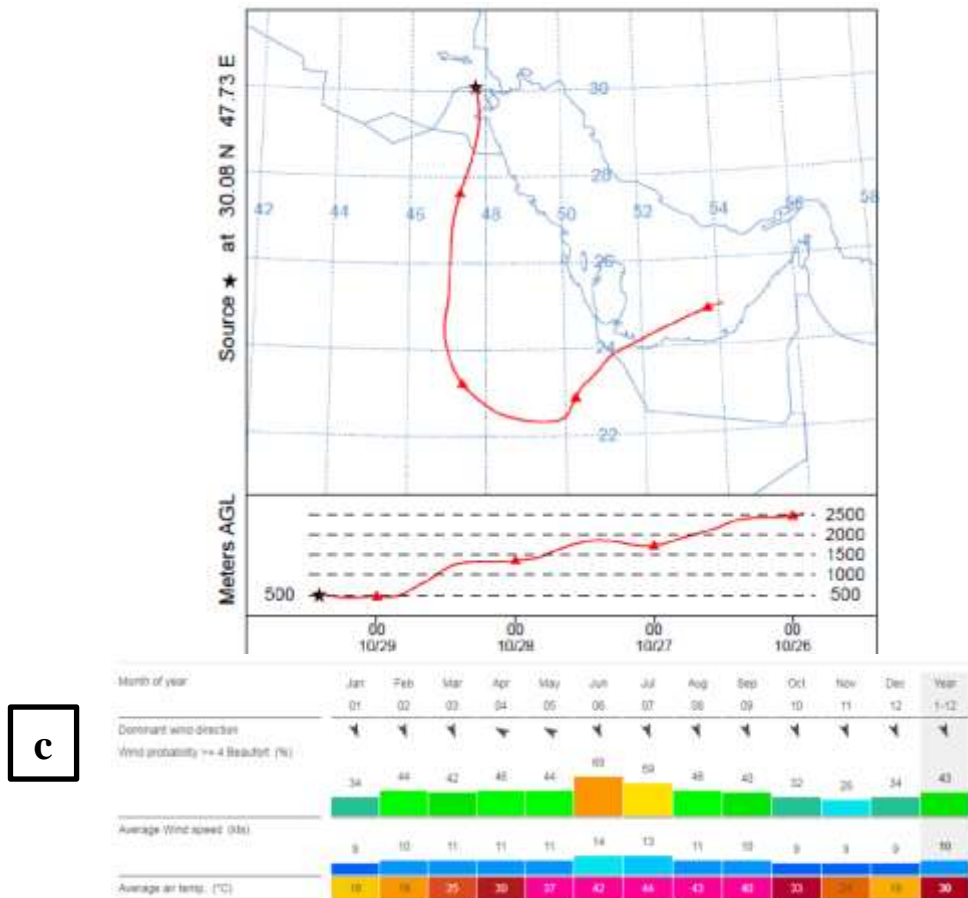

Figure S1: (a) Annual windrose – Kuwait (Source: [http://www.Windfinder.com / windstatistics](http://www.Windfinder.com/windstatistics)); (b) Sites of sampling (map source <https://www.graphicmaps.com/kuwait> )Al Abdally-Remote;Kuwait City-Urban (c) Dominant wind direction (Abdalli October 8, 2017).
