# Supplementary material for: Spatio-temporal variations in bacterial and fungal community associated with dust aerosol in Kuwait
Source: PubMed Central journal article supplement (PMC7644028; doi:10.1371/journal.pone.0241283), 2020-11-05
Supplement: pone.0241283.s003.pdf [file pone.0241283.s003.pdf]

## Supplementary File S5: Taxonomy and Core Microbiome Analysis

### Bacterial Taxonomy

Table S5a: Bacterial Taxonomic classification at Phylum level

|   | Taxa              | Abundance | Percentage |
|---|-------------------|-----------|------------|
| 1 | p__Proteobacteria | 212887    | 97.67      |
| 3 | p__Actinobacteria | 2455      | 1.13       |
| 2 | p__Bacteroidetes  | 1816      | 0.83       |
| 4 | p__Firmicutes     | 719       | 0.33       |
| 5 | Unclassified      | 83        | 0.04       |

Table S5b: Bacterial Taxonomic Classification at Class level

|   | Taxa                   | Abundance | Percentage |
|---|------------------------|-----------|------------|
| 1 | c__Gammaproteobacteria | 154928    | 71.04      |
| 3 | c__Alphaproteobacteria | 57835     | 26.52      |
| 4 | c__Actinobacteria      | 2472      | 1.13       |
| 2 | c__Bacteroidia         | 1832      | 0.84       |
| 6 | c__Bacilli             | 606       | 0.28       |
| 8 | Not_Assigned           | 294       | 0.13       |
| 5 | c__Clostridia          | 86        | 0.04       |
| 7 | c__Erysipelotrichia    | 27        | 0.01       |

Table S5c: Bacterial Taxonomic Classification at Order level

|    | Taxa                     | Abundance | Percentage |
|----|--------------------------|-----------|------------|
| 3  | o__Betaproteobacteriales | 94938     | 43.53      |
| 10 | o__Pseudomonadales       | 51984     | 23.84      |
| 4  | o__Caulobacterales       | 27903     | 12.79      |
| 12 | o__Sphingomonadales      | 20246     | 9.28       |
| 11 | o__Rhizobiales           | 8664      | 3.97       |
| 8  | o__Oceanospirillales     | 2958      | 1.36       |
| 13 | o__Xanthomonadales       | 2396      | 1.1        |
| 14 | Others                   | 1785      | 0.82       |
| 6  | o__Cytophagales          | 1561      | 0.72       |
| 2  | o__Alteromonadales       | 1414      | 0.65       |
| 7  | o__Micrococcales         | 1360      | 0.62       |
| 1  | Not_Assigned             | 1100      | 0.5        |
| 5  | o__Corynebacteriales     | 929       | 0.43       |
| 9  | o__Parvibaculales        | 842       | 0.39       |

Table S5d: Bacterial Taxonomic Classification at Family Level

|    | Taxa                     | Abundance | Percentage |
|----|--------------------------|-----------|------------|
| 1  | f__Burkholderiaceae      | 94938     | 43.53      |
| 2  | f__Pseudomonadaceae      | 48578     | 22.28      |
| 3  | f__Caulobacteraceae      | 27903     | 12.79      |
| 4  | f__Sphingomonadaceae     | 20246     | 9.28       |
| 5  | f__Rhizobiaceae          | 6572      | 3.01       |
| 6  | f__Moraxellaceae         | 3406      | 1.56       |
| 7  | f__Halomonadaceae        | 2851      | 1.31       |
| 8  | f__Xanthomonadaceae      | 2396      | 1.1        |
| 9  | f__Hymenobacteraceae     | 1561      | 0.72       |
| 10 | f__Shewanellaceae        | 1414      | 0.65       |
| 11 | f__Devosiaceae           | 1286      | 0.59       |
| 12 | Not_Assigned             | 1100      | 0.5        |
| 13 | f__Corynebacteriaceae    | 929       | 0.43       |
| 14 | f__Parvibaculaceae       | 842       | 0.39       |
| 15 | f__Microbacteriaceae     | 690       | 0.32       |
| 16 | f__Beijerinckiaceae      | 658       | 0.3        |
| 17 | f__Micrococcaceae        | 484       | 0.22       |
| 18 | f__Solimonadaceae        | 432       | 0.2        |
| 19 | f__Staphylococcaceae     | 321       | 0.15       |
| 20 | f__Bacillaceae           | 285       | 0.13       |
| 21 | f__Flavobacteriaceae     | 271       | 0.12       |
| 22 | f__Intrasporangiaceae    | 156       | 0.07       |
| 23 | f__Propionibacteriaceae  | 153       | 0.07       |
| 24 | f__Xanthobacteraceae     | 148       | 0.07       |
| 25 | f__Rhodobacteraceae      | 137       | 0.06       |
| 26 | f__Hahellaceae           | 82        | 0.04       |
| 27 | f__Peptostreptococcaceae | 49        | 0.02       |
| 28 | f__Azospirillaceae       | 43        | 0.02       |
| 29 | f__Clostridiaceae_1      | 37        | 0.02       |
| 30 | f__Dermabacteraceae      | 30        | 0.01       |
| 31 | f__Erysipelotrichaceae   | 27        | 0.01       |
| 32 | f__SS1_B_06_26           | 25        | 0.01       |
| 33 | f__Nocardiodaceae        | 15        | 0.01       |
| 34 | f__Geodermatophilaceae   | 15        | 0.01       |

Table S5e: Bacterial Taxonomic Classification at Genus level

|    | Taxa                 | Abundance | Percentage |
|----|----------------------|-----------|------------|
| 1  | Not_Assigned         | 127725    | 58.57      |
| 2  | g__Brevundimonas     | 27248     | 12.49      |
| 3  | g__Sphingobium       | 7196      | 3.3        |
| 4  | g__Sphingopyxis      | 6035      | 2.77       |
| 5  | g__Pseudomonas       | 5448      | 2.5        |
| 6  | g__Sphingomonas      | 5265      | 2.41       |
| 7  | g__Massilia          | 5143      | 2.36       |
| 8  | g__Acidovorax        | 4461      | 2.05       |
| 9  | g__Allorhizobium     | 3840      | 1.76       |
| 10 | g__Halomonas         | 2851      | 1.31       |
| 11 | g__Mesorhizobium     | 2492      | 1.14       |
| 12 | g__Novosphingobium   | 1750      | 0.8        |
| 13 | g__Pseudoxanthomonas | 1709      | 0.78       |
| 14 | g__Enhydrobacter     | 1606      | 0.74       |
| 15 | g__Pontibacter       | 1561      | 0.72       |
| 16 | g__Shewanella        | 1414      | 0.65       |
| 17 | g__Cavicella         | 1404      | 0.64       |
| 18 | g__Devosia           | 1286      | 0.59       |
| 19 | g__Achromobacter     | 1015      | 0.47       |
| 20 | g__Corynebacterium_1 | 929       | 0.43       |
| 21 | g__Parvibaculum      | 842       | 0.39       |
| 22 | g__Delftia           | 822       | 0.38       |
| 23 | g__Stenotrophomonas  | 687       | 0.32       |
| 24 | g__Rhizobacter       | 585       | 0.27       |
| 25 | g__Microvirga        | 484       | 0.22       |
| 26 | g__uncultured        | 463       | 0.21       |
| 27 | g__Variovorax        | 461       | 0.21       |
| 28 | g__Azotobacter       | 447       | 0.2        |
| 29 | g__Hydrocarboniphaga | 432       | 0.2        |
| 30 | g__Pseudarthrobacter | 339       | 0.16       |
| 31 | g__Staphylococcus    | 321       | 0.15       |
| 32 | g__Bacillus          | 285       | 0.13       |
| 33 | g__Salinimicrobium   | 271       | 0.12       |
| 34 | g__Methylobacterium  | 174       | 0.08       |
| 35 | g__Tetrasphaera      | 156       | 0.07       |
| 36 | g__Cutibacterium     | 153       | 0.07       |
| 37 | g__Bradyrhizobium    | 148       | 0.07       |
| 38 | g__Kocuria           | 95        | 0.04       |
| 39 | g__Hahella           | 82        | 0.04       |

|    |                                |    |      |
|----|--------------------------------|----|------|
| 40 | g__Paracoccus                  | 80 | 0.04 |
| 41 | g__Ramlibacter                 | 69 | 0.03 |
| 42 | g__Micrococcus                 | 50 | 0.02 |
| 43 | g__Romboutsia                  | 49 | 0.02 |
| 44 | g__Skermanella                 | 43 | 0.02 |
| 45 | g__Noviherbaspirillum          | 40 | 0.02 |
| 46 | g__Clostridium_sensu_stricto_1 | 37 | 0.02 |
| 47 | g__Brachybacterium             | 30 | 0.01 |
| 48 | g__Turicibacter                | 27 | 0.01 |
| 49 | g__Aeromicrobium               | 15 | 0.01 |
| 50 | g__Blastococcus                | 15 | 0.01 |

Table S5f: **Core Bacteriome:** The core Bacteriome analysis was performed on the set of 224 OTUs filtered through the MicrobiomeAnalyst. The below taxa with a sample prevalence of 20% and a relative abundance above 0.01 was obtained as the core bacteriome.

|                      | <b>Prevelance</b> |
|----------------------|-------------------|
| g__Brevundimonas     | 1                 |
| g__Mesorhizobium     | 1                 |
| Not_Assigned         | 1                 |
| g__Allorhizobium     | 0.8               |
| g__Massilia          | 0.8               |
| g__Devosia           | 0.75              |
| g__Pseudomonas       | 0.75              |
| g__Achromobacter     | 0.65              |
| g__Sphingopyxis      | 0.65              |
| g__Azotobacter       | 0.45              |
| g__Microvirga        | 0.4               |
| g__Sphingomonas      | 0.4               |
| g__Stenotrophomonas  | 0.35              |
| g__Acidovorax        | 0.3               |
| g__Cavicella         | 0.3               |
| g__Novosphingobium   | 0.3               |
| g__Parvibaculum      | 0.3               |
| g__Pseudoxanthomonas | 0.3               |
| g__uncultured        | 0.3               |
| g__Variovorax        | 0.3               |
| g__Bacillus          | 0.25              |
| g__Halomonas         | 0.25              |
| g__Hydrocarboniphaga | 0.25              |
| g__Pseudarthrobacter | 0.25              |

|                                |      |
|--------------------------------|------|
| g__Sphingobium                 | 0.25 |
| g__Corynebacterium_1           | 0.2  |
| g__Pontibacter                 | 0.2  |
| g__Rhizobacter                 | 0.2  |
| g__Shewanella                  | 0.2  |
| g__Bradyrhizobium              | 0.15 |
| g__Enhydrobacter               | 0.15 |
| g__Cutibacterium               | 0.1  |
| g__Delftia                     | 0.1  |
| g__Hahella                     | 0.05 |
| g__Kocuria                     | 0.05 |
| g__Methylobacterium            | 0.05 |
| g__Micrococcus                 | 0.05 |
| g__Noviherbaspirillum          | 0.05 |
| g__Paracoccus                  | 0.05 |
| g__Ramlibacter                 | 0.05 |
| g__Salinimicrobium             | 0.05 |
| g__Staphylococcus              | 0.05 |
| g__Tetrasphaera                | 0.05 |
| g__Aeromicrobium               | 0    |
| g__Blastococcus                | 0    |
| g__Brachybacterium             | 0    |
| g__Clostridium_sensu_stricto_1 | 0    |
| g__Romboutsia                  | 0    |
| g__Skermanella                 | 0    |
| g__Turicibacter                | 0    |

## Fungal Taxonomy

**Table S5g: Fungal Taxonomic classification at Phylum level**

|   | Taxa             | Abundance | Percentage |
|---|------------------|-----------|------------|
| 1 | p__Ascomycota    | 347907    | 64.19      |
| 2 | p__Basidiomycota | 122714    | 22.64      |
| 3 | Unclassified     | 64018     | 11.81      |
| 4 | p__Zygomycota    | 7321      | 1.35       |

**Table S5h: Fungal Taxonomic Classification at Class level**

|    | Taxa                  | Abundance | Percentage |
|----|-----------------------|-----------|------------|
| 3  | c__Dothideomycetes    | 190556    | 35.16      |
| 4  | Not_Assigned          | 95622     | 17.64      |
| 8  | c__Tremellomycetes    | 68808     | 12.7       |
| 5  | c__Eurotiomycetes     | 52968     | 9.77       |
| 1  | c__Sordariomycetes    | 36534     | 6.74       |
| 7  | c__Agaricomycetes     | 33707     | 6.22       |
| 10 | c__Saccharomycetes    | 25077     | 4.63       |
| 2  | c__Incertae_sedis     | 24110     | 4.45       |
| 9  | c__Leotiomycetes      | 8393      | 1.55       |
| 11 | c__Microbotryomycetes | 2775      | 0.51       |
| 6  | c__Pezizomycetes      | 2166      | 0.4        |
| 14 | c__unidentified       | 882       | 0.16       |
| 12 | c__Wallemiomycetes    | 203       | 0.04       |
| 13 | c__Ustilaginomycetes  | 83        | 0.02       |
| 15 | c__Exobasidiomycetes  | 76        | 0.01       |

**Table S5i: Fungal Taxonomic Classification at Order level**

|    | Taxa                 | Abundance | Percentage |
|----|----------------------|-----------|------------|
| 13 | o__Capnodiales       | 104331    | 19.25      |
| 4  | Not_Assigned         | 97407     | 17.97      |
| 3  | o__Pleosporales      | 83150     | 15.34      |
| 9  | o__Filobasidiales    | 66286     | 12.23      |
| 5  | o__Eurotiales        | 48019     | 8.86       |
| 12 | o__Hypocreales       | 29173     | 5.38       |
| 11 | o__Saccharomycetales | 25085     | 4.63       |
| 7  | o__Polyporales       | 23711     | 4.38       |
| 2  | o__Malasseziales     | 16170     | 2.98       |
| 20 | o__Agaricales        | 8894      | 1.64       |

|    |                    |      |      |
|----|--------------------|------|------|
| 10 | o__Helotiales      | 7531 | 1.39 |
| 24 | o__Mucorales       | 3979 | 0.73 |
| 1  | o__Microascales    | 3817 | 0.7  |
| 17 | o__Chaetothyriales | 3380 | 0.62 |
| 22 | o__Mortierellales  | 3329 | 0.61 |
| 27 | o__Dothideales     | 3159 | 0.58 |
| 15 | o__Sporidiobolales | 2784 | 0.51 |
| 16 | o__Sordariales     | 2536 | 0.47 |
| 23 | o__Tremellales     | 2116 | 0.39 |
| 6  | o__Pezizales       | 1918 | 0.35 |
| 19 | o__Onygenales      | 1244 | 0.23 |
| 26 | o__unidentified    | 1147 | 0.21 |
| 21 | o__Erysiphales     | 911  | 0.17 |
| 14 | o__Hymenochaetales | 818  | 0.15 |
| 25 | o__Incertae_sedis  | 699  | 0.13 |
| 18 | o__Wallemiales     | 204  | 0.04 |
| 28 | o__Ustilaginales   | 87   | 0.02 |
| 8  | o__Xylariales      | 75   | 0.01 |

Table S5j: Fungal Taxonomic Classification at Family level

|    | Taxa                   | Abundance | Percentage |
|----|------------------------|-----------|------------|
| 2  | Not_Assigned           | 149342    | 27.56      |
| 8  | f__Mycosphaerellaceae  | 97185     | 17.93      |
| 6  | f__Filobasidiaceae     | 66239     | 12.22      |
| 3  | f__Pleosporaceae       | 62007     | 11.44      |
| 4  | f__Trichocomaceae      | 48028     | 8.86       |
| 7  | f__Incertae_sedis      | 36588     | 6.75       |
| 10 | f__unidentified        | 18877     | 3.48       |
| 21 | f__Nectriaceae         | 8997      | 1.66       |
| 35 | f__Schizophyllaceae    | 8622      | 1.59       |
| 19 | f__Sporormiaceae       | 5822      | 1.07       |
| 27 | f__Mucoraceae          | 3993      | 0.74       |
| 1  | f__Microascaceae       | 3766      | 0.69       |
| 12 | f__Herpotrichiellaceae | 3386      | 0.62       |
| 24 | f__Mortierellaceae     | 3333      | 0.61       |
| 31 | f__Dothioraceae        | 2903      | 0.54       |
| 15 | f__Clavicipitaceae     | 2395      | 0.44       |
| 38 | f__Teratosphaeriaceae  | 2286      | 0.42       |
| 25 | f__Trichosporonaceae   | 2120      | 0.39       |
| 37 | f__Hypocreaceae        | 2000      | 0.37       |

|    |                       |      |      |
|----|-----------------------|------|------|
| 28 | f__Polyporaceae       | 1915 | 0.35 |
| 11 | f__Chaetomiaceae      | 1716 | 0.32 |
| 5  | f__Pezizaceae         | 1530 | 0.28 |
| 33 | f__Tubeufiaceae       | 1268 | 0.23 |
| 16 | f__Onygenaceae        | 1087 | 0.2  |
| 18 | f__Fomitopsidaceae    | 1062 | 0.2  |
| 23 | f__Erysiphaceae       | 908  | 0.17 |
| 9  | f__Hymenochaetaceae   | 828  | 0.15 |
| 13 | f__Cordycipitaceae    | 777  | 0.14 |
| 26 | f__Lasiosphaeriaceae  | 734  | 0.14 |
| 22 | f__Debaryomycetaceae  | 707  | 0.13 |
| 29 | f__Sclerotiniaceae    | 591  | 0.11 |
| 34 | f__Ascobolaceae       | 212  | 0.04 |
| 14 | f__Wallemiaceae       | 210  | 0.04 |
| 17 | f__Gymnoascaceae      | 209  | 0.04 |
| 20 | f__Marasmiaceae       | 130  | 0.02 |
| 32 | f__Ustilaginaceae     | 87   | 0.02 |
| 36 | f__Saccharomycodaceae | 54   | 0.01 |
| 30 | f__Psathyrellaceae    | 46   | 0.01 |

Table S5k: Fungal Taxonomic Classification at Genus level

|    | Taxa             | Abundance | Percentage |
|----|------------------|-----------|------------|
| 2  | Not_Assigned     | 172419    | 31.81      |
| 5  | g__unidentified  | 102488    | 18.91      |
| 9  | g__Cryptococcus  | 65663     | 12.12      |
| 3  | g__Alternaria    | 46554     | 8.59       |
| 7  | g__Aspergillus   | 36298     | 6.7        |
| 11 | g__Candida       | 16577     | 3.06       |
| 12 | g__Cladosporium  | 15920     | 2.94       |
| 56 | g__Schizophyllum | 8622      | 1.59       |
| 31 | g__Fusarium      | 7511      | 1.39       |
| 10 | g__Gloeotinia    | 6920      | 1.28       |
| 4  | g__Penicillium   | 6216      | 1.15       |
| 18 | g__Pleospora     | 4189      | 0.77       |
| 42 | g__Mucor         | 3993      | 0.74       |
| 37 | g__Mortierella   | 3333      | 0.61       |
| 30 | g__Eurotium      | 3010      | 0.56       |
| 52 | g__Aureobasidium | 2903      | 0.54       |
| 8  | g__Cochliobolus  | 2661      | 0.49       |
| 23 | g__Malassezia    | 2609      | 0.48       |



|    |                     |      |      |
|----|---------------------|------|------|
| 24 | g__Rhodotorula      | 2299 | 0.42 |
| 63 | g__Hortaea          | 2286 | 0.42 |
| 40 | g__Trichosporon     | 2120 | 0.39 |
| 46 | g__Exophiala        | 1944 | 0.36 |
| 38 | g__Beauveria        | 1609 | 0.3  |
| 55 | g__Gibberella       | 1486 | 0.27 |
| 45 | g__Cerrena          | 1435 | 0.26 |
| 39 | g__Scedosporium     | 1420 | 0.26 |
| 49 | g__Chaetomium       | 1369 | 0.25 |
| 54 | g__Thaxteriellopsis | 1268 | 0.23 |
| 28 | g__Setosphaeria     | 1191 | 0.22 |
| 61 | g__Cercospora       | 1077 | 0.2  |
| 27 | g__Fomitopsis       | 1062 | 0.2  |
| 60 | g__Trichoderma      | 999  | 0.18 |
| 13 | g__Phellinus        | 828  | 0.15 |
| 20 | g__Lecanicillium    | 777  | 0.14 |
| 6  | g__Emericella       | 739  | 0.14 |
| 35 | g__Blumeria         | 731  | 0.13 |
| 34 | g__Meyerozyma       | 707  | 0.13 |
| 41 | g__Doratomyces      | 668  | 0.12 |
| 22 | g__Myrothecium      | 643  | 0.12 |
| 44 | g__Tritirachium     | 602  | 0.11 |
| 47 | g__Botryotinia      | 591  | 0.11 |
| 33 | g__Cordyceps        | 579  | 0.11 |
| 19 | g__Kodamaea         | 570  | 0.11 |
| 51 | g__Acremonium       | 560  | 0.1  |
| 62 | g__Megasporoporia   | 480  | 0.09 |
| 14 | g__Sporobolomyces   | 453  | 0.08 |
| 17 | g__Fonsecaea        | 438  | 0.08 |
| 48 | g__Cladorrhinum     | 363  | 0.07 |
| 1  | g__Microascus       | 302  | 0.06 |
| 36 | g__Bipolaris        | 290  | 0.05 |
| 15 | g__Pseudallescheria | 276  | 0.05 |
| 32 | g__Lewia            | 263  | 0.05 |
| 16 | g__Stachybotrys     | 213  | 0.04 |
| 21 | g__Wallemia         | 210  | 0.04 |
| 26 | g__Gymnascella      | 209  | 0.04 |
| 58 | g__Meira            | 183  | 0.03 |
| 64 | g__Erysiphe         | 177  | 0.03 |
| 43 | g__Pyrenophora      | 161  | 0.03 |
| 25 | g__Metarhizium      | 130  | 0.02 |

|    |                   |     |      |
|----|-------------------|-----|------|
| 29 | g__Marasmius      | 130 | 0.02 |
| 53 | g__Ustilago       | 87  | 0.02 |
| 57 | g__Hanseniaspora  | 54  | 0.01 |
| 59 | g__Scopulariopsis | 49  | 0.01 |
| 50 | g__Coprionellus   | 46  | 0.01 |

Table S51: Fungal Taxonomic classification at species level

|    | Taxa                          | Abundance | Percentage |
|----|-------------------------------|-----------|------------|
| 1  | Not_Assigned                  | 225762    | 41.66      |
| 2  | s__unculturedCladosporium     | 80188     | 14.8       |
| 3  | s__Alternaria_brassicae       | 46447     | 8.57       |
| 4  | s__Cryptococcus_oeirensis     | 30610     | 5.65       |
| 5  | s__Cryptococcus_albidus       | 21755     | 4.01       |
| 6  | s__Candida_parapsilosis       | 13002     | 2.4        |
| 7  | s__Aspergillus_gracilis       | 10667     | 1.97       |
| 8  | s__Aspergillus_penicillioides | 9536      | 1.76       |
| 9  | s__unculturedfungus           | 9376      | 1.73       |
| 10 | s__Schizophyllum_commune      | 8622      | 1.59       |
| 11 | s__Gloeotinia_temulenta       | 6920      | 1.28       |
| 12 | s__Cryptococcus_carnescens    | 5205      | 0.96       |
| 13 | s__Capnodiales_sp_TR006       | 4385      | 0.81       |
| 14 | s__Aspergillus_versicolor     | 3060      | 0.56       |
| 15 | s__Cryptococcus_stepposus     | 2738      | 0.51       |
| 16 | s__Aureobasidium_pullulans    | 2702      | 0.5        |
| 17 | s__unculturedMalassezia       | 2584      | 0.48       |
| 18 | s__Cryptococcus_laurentii     | 2390      | 0.44       |
| 19 | s__Malassezia_globosa         | 2334      | 0.43       |
| 20 | s__Rhodotorula_mucilaginosa   | 2299      | 0.42       |
| 21 | s__Hortaea_werneckii          | 2286      | 0.42       |
| 22 | s__Trichosporon_asahii        | 2120      | 0.39       |
| 23 | s__Cryptococcus_magnus        | 2083      | 0.38       |
| 24 | s__Exophiala_dermatitidis     | 1944      | 0.36       |
| 25 | s__Pleospora_herbarum         | 1846      | 0.34       |
| 26 | s__Candida_sp_F15             | 1812      | 0.33       |
| 27 | s__unculturedEurotium         | 1765      | 0.33       |
| 28 | s__Aspergillus_niger          | 1732      | 0.32       |
| 29 | s__Candida_tropicalis         | 1639      | 0.3        |
| 30 | s__Beauveria_bassiana         | 1609      | 0.3        |
| 31 | s__Fusarium_oxysporum         | 1594      | 0.29       |
| 33 | s__Eurotium_niveoglaucum      | 1542      | 0.28       |

|    |                                |      |      |
|----|--------------------------------|------|------|
| 32 | s__Pezizaceae_sp_F13           | 1530 | 0.28 |
| 35 | s__Cerreana_unicolor           | 1435 | 0.26 |
| 34 | s__Scedosporium_prolificans    | 1420 | 0.26 |
| 36 | s__Chaetomium_globosum         | 1369 | 0.25 |
| 37 | s__Aspergillus_peyronelii      | 1270 | 0.23 |
| 38 | s__Thaxteriellopsis_lignicola  | 1268 | 0.23 |
| 39 | s__Cochliobolus_sp_FSU9312     | 1210 | 0.22 |
| 40 | s__Setosphaeria_rostrata       | 1191 | 0.22 |
| 42 | s__Cercospora_capsici          | 1077 | 0.2  |
| 41 | s__Fomitopsis_sp_CLF_T         | 1062 | 0.2  |
| 43 | s__Gibberella_intermedia       | 977  | 0.18 |
| 44 | s__Cochliobolus_sp_007 L 1_1   | 896  | 0.17 |
| 45 | s__Phellinus_noxius            | 828  | 0.15 |
| 47 | s__Cryptococcus_dimennae       | 777  | 0.14 |
| 48 | s__Lecanicillium_fusisporum    | 777  | 0.14 |
| 46 | s__Emericella_nidulans         | 739  | 0.14 |
| 49 | s__Blumeria_graminis           | 731  | 0.13 |
| 53 | s__Tritirachium_sp_IAM_14522   | 602  | 0.11 |
| 52 | s__Cladosporium_sp_B09         | 591  | 0.11 |
| 54 | s__Botryotinia_fuckeliana      | 591  | 0.11 |
| 51 | s__Penicillium_capsulatum      | 573  | 0.11 |
| 50 | s__Kodamaea_ohmeri             | 570  | 0.11 |
| 56 | s__Cochliobolus_sativus        | 555  | 0.1  |
| 55 | s__Cordyceps_chlamydosporia    | 554  | 0.1  |
| 57 | s__Gibberella_zeae             | 509  | 0.09 |
| 58 | s__Megasporoporia_sp_HJL_2012d | 480  | 0.09 |
| 59 | s__Fonsecaea_pedrosoi          | 438  | 0.08 |
| 60 | s__Myrothecium_verrucaria      | 435  | 0.08 |
| 61 | s__Cladorrhinum_bulbillosum    | 363  | 0.07 |
| 64 | s__Cladosporium_sp_ZJ_2008016  | 342  | 0.06 |
| 63 | s__Doratomyces_sp_HZ_10        | 322  | 0.06 |
| 62 | s__Microascus_sp_4L1           | 302  | 0.06 |
| 65 | s__Pseudallescheria_fimeti     | 276  | 0.05 |
| 67 | s__Malassezia_symptodialis     | 275  | 0.05 |
| 66 | s__Pezizomycetes_sp_BLD9       | 252  | 0.05 |
| 68 | s__Stachybotrys_chlorohalonata | 213  | 0.04 |
| 70 | s__Gymnascella_aurantiaca      | 209  | 0.04 |
| 69 | s__Myrothecium_gramineum       | 208  | 0.04 |
| 72 | s__Aspergillus_terreus         | 185  | 0.03 |
| 75 | s__Meira_sp_VegaE2_32          | 183  | 0.03 |
| 76 | s__Erysiphe_convolvuli         | 177  | 0.03 |

|    |                                |     |      |
|----|--------------------------------|-----|------|
| 71 | s__Penicillium_chrysogenum     | 166 | 0.03 |
| 74 | s__Pyrenophora_graminea        | 161 | 0.03 |
| 73 | s__Pezizales_sp_P10            | 149 | 0.03 |
| 79 | s__Metarhizium_anisopliae      | 130 | 0.02 |
| 80 | s__Marasmius_leveilleanus      | 130 | 0.02 |
| 78 | s__unculturedThielavia         | 128 | 0.02 |
| 83 | s__Sporobolomyces_roseus       | 126 | 0.02 |
| 82 | s__Candida_orthopsilosis       | 124 | 0.02 |
| 77 | s__Cryptococcus_sp_HB_1222     | 105 | 0.02 |
| 81 | s__Ustilago_hordei             | 87  | 0.02 |
| 86 | s__Acremonium_implicatum       | 80  | 0.01 |
| 84 | s__Hypocreales_sp_SCSGAF0072   | 77  | 0.01 |
| 88 | s__Cladosporium_sp_F128        | 62  | 0.01 |
| 87 | s__Hanseniaspora_uvarum        | 54  | 0.01 |
| 85 | s__Coprinellus_sp_Daams_72_68a | 46  | 0.01 |
| 89 | s__Aspergillus_caespitosus     | 19  | 0    |

Table S5m **Core Fungal Biome:** The core fungal biome analysis was performed on the set of 371 OTUs filtered through the MicrobiomeAnalyst. A set of 65 taxa with a sample prevalence of 20% and a relative abundance above 0.01 was obtained as the core microbiome.

|                     | Prevelance |     |
|---------------------|------------|-----|
| Not_Assigned        | 1          | 100 |
| g__unidentified     | 1          | 100 |
| g__Cryptococcus     | 1          | 100 |
| g__Alternaria       | 1          | 100 |
| g__Aspergillus      | 0.9        | 90  |
| g__Cladosporium     | 0.75       | 75  |
| g__Fusarium         | 0.6        | 60  |
| g__Candida          | 0.55       | 55  |
| g__Schizophyllum    | 0.3        | 30  |
| g__Penicillium      | 0.25       | 25  |
| g__Pleospora        | 0.2        | 20  |
| g__Mucor            | 0.2        | 20  |
| g__Cochliobolus     | 0.2        | 20  |
| g__Aureobasidium    | 0.2        | 20  |
| g__Scedosporium     | 0.15       | 15  |
| g__Mortierella      | 0.15       | 15  |
| g__Malassezia       | 0.15       | 15  |
| g__Hortaea          | 0.15       | 15  |
| g__Thaxteriellopsis | 0.1        | 10  |

|                     |      |    |
|---------------------|------|----|
| g__Gloeotinia       | 0.1  | 10 |
| g__Eurotium         | 0.1  | 10 |
| g__Chaetomium       | 0.1  | 10 |
| g__Cerrena          | 0.1  | 10 |
| g__Tritirachium     | 0.05 | 5  |
| g__Trichosporon     | 0.05 | 5  |
| g__Setosphaeria     | 0.05 | 5  |
| g__Rhodotorula      | 0.05 | 5  |
| g__Phellinus        | 0.05 | 5  |
| g__Lecanicillium    | 0.05 | 5  |
| g__Gibberella       | 0.05 | 5  |
| g__Fonsecaea        | 0.05 | 5  |
| g__Fomitopsis       | 0.05 | 5  |
| g__Exophiala        | 0.05 | 5  |
| g__Emericella       | 0.05 | 5  |
| g__Cordyceps        | 0.05 | 5  |
| g__Cercospora       | 0.05 | 5  |
| g__Blumeria         | 0.05 | 5  |
| g__Beauveria        | 0.05 | 5  |
| g__Wallemia         | 0    | 0  |
| g__Ustilago         | 0    | 0  |
| g__Trichoderma      | 0    | 0  |
| g__Stachybotrys     | 0    | 0  |
| g__Sporobolomyces   | 0    | 0  |
| g__Scopulariopsis   | 0    | 0  |
| g__Pyrenophora      | 0    | 0  |
| g__Pseudallescheria | 0    | 0  |
| g__Myrothecium      | 0    | 0  |
| g__Microascus       | 0    | 0  |
| g__Meyerozyma       | 0    | 0  |
| g__Meira            | 0    | 0  |
| g__Megasporoporia   | 0    | 0  |
| g__Marasmius        | 0    | 0  |
| g__Lewia            | 0    | 0  |
| g__Kodamaea         | 0    | 0  |
| g__Hanseniaspora    | 0    | 0  |
| g__Gymnascella      | 0    | 0  |
| g__Erysiphe         | 0    | 0  |
| g__Doratomyces      | 0    | 0  |
| g__Coprinellus      | 0    | 0  |
| g__Cladorrhinum     | 0    | 0  |

|                |   |   |
|----------------|---|---|
| g__Botryotinia | 0 | 0 |
| g__Bipolaris   | 0 | 0 |
| g__Acremonium  | 0 | 0 |
