# Supplementary material for: Spatio-temporal variations in bacterial and fungal community associated with dust aerosol in Kuwait
Source: PubMed Central journal article supplement (PMC7644028; doi:10.1371/journal.pone.0241283), 2020-11-05
Supplement: pone.0241283.s004.pdf [file pone.0241283.s004.pdf]

## Linear Discriminant Analysis

**Table S7a: LDA analysis of bacterial genus according to the site**

The table below shows at most 500 features ranked by their p values, with significant features highlighted in orange.

| Name                           | Pvalues   | FDR      | Remote    | Urban     | LDAscore | View                    |
|--------------------------------|-----------|----------|-----------|-----------|----------|-------------------------|
| g__Pontibacter                 | 5.4399E-4 | 0.0272   | 154040.0  | 2404.2    | 4.88     | <a href="#">Details</a> |
| g__Romboutsia                  | 0.0015463 | 0.038657 | 4155.0    | 156.51    | 3.3      | <a href="#">Details</a> |
| g__Clostridium_sensu_stricto_1 | 0.0083345 | 0.13891  | 3184.5    | 161.63    | 3.18     | <a href="#">Details</a> |
| g__Turicibacter                | 0.012891  | 0.14921  | 3107.1    | 96.699    | 3.18     | <a href="#">Details</a> |
| Not_Assigned                   | 0.016703  | 0.14921  | 4050600.0 | 7380400.0 | -6.22    | <a href="#">Details</a> |
| g__Acidovorax                  | 0.017605  | 0.14921  | 360830.0  | 75175.0   | 5.15     | <a href="#">Details</a> |
| g__Noviherbaspirillum          | 0.027538  | 0.17808  | 4690.8    | 161.14    | 3.35     | <a href="#">Details</a> |
| g__Rhizobacter                 | 0.028493  | 0.17808  | 49717.0   | 6918.3    | 4.33     | <a href="#">Details</a> |
| g__Salinimicrobium             | 0.033952  | 0.18089  | 26357.0   | 205.57    | 4.15     | <a href="#">Details</a> |
| g__Ramlibacter                 | 0.036173  | 0.18089  | 5649.7    | 245.49    | 3.45     | <a href="#">Details</a> |
| g__Brevundimonas               | 0.044083  | 0.20038  | 1990000.0 | 629540.0  | 5.63     | <a href="#">Details</a> |
| g__Parvibaculum                | 0.074091  | 0.27571  | 77982.0   | 6454.5    | 4.54     | <a href="#">Details</a> |
| g__Cavicella                   | 0.082151  | 0.27571  | 126880.0  | 14684.0   | 4.75     | <a href="#">Details</a> |
| n__Arntibacter                 | 0.087376  | 0.27571  | 14767.0   | 23847.0   | -3.66    | <a href="#">Details</a> |

Table S7b: LDA analysis of bacterial genus according to the season

The table below shows of most 500 features ranked by their p-values, with significant features highlighted in orange.

| Name                        | Pvalue    | FDR       | Spring    | Summer    | Winter    | LDA score | View                    |
|-----------------------------|-----------|-----------|-----------|-----------|-----------|-----------|-------------------------|
| g__Novosphingobium          | 3.4787E-4 | 0.0044121 | 0.0       | 10081.0   | 280740.0  | 5.17      | <a href="#">Details</a> |
| g__Candida                  | 4.6270E-4 | 0.0044121 | 0.0       | 4002.2    | 203830.0  | 5.1       | <a href="#">Details</a> |
| g__Sphingomonas             | 5.2094E-4 | 0.0044121 | 601.83    | 83245.0   | 884000.0  | 5.05      | <a href="#">Details</a> |
| g__Micrococcus              | 5.5094E-4 | 0.0044121 | 0.0       | 5029.9    | 278.85    | 3.47      | <a href="#">Details</a> |
| g__uncultured               | 7.4348E-4 | 0.0044121 | 0.0       | 4158.9    | 13378.0   | 4.87      | <a href="#">Details</a> |
| g__Diphylococcus            | 8.2809E-4 | 0.0044121 | 142.8     | 37577.0   | 178.58    | 4.27      | <a href="#">Details</a> |
| g__Marella                  | 8.0013E-3 | 0.0044121 | 121980.0  | 472700.0  | 888.8     | 5.27      | <a href="#">Details</a> |
| g__Sphingobium              | 9.0010E-9 | 0.0044121 | 85.383    | 1798.2    | 1822900.0 | 5.82      | <a href="#">Details</a> |
| g__Aeromicrobium            | 9.0010E-1 | 0.0044121 | 3071.9    | 279.59    | 0.0       | 3.0       | <a href="#">Details</a> |
| g__Helomonas                | 9.0010E-4 | 0.0044121 | 2484.3    | 32280.0   | 1981.2    | 5.2       | <a href="#">Details</a> |
| g__Sphingopsis              | 9.0011E-3 | 0.0044121 | 538.85    | 982740.0  | 310000.0  | 5.45      | <a href="#">Details</a> |
| g__Erythrobacter            | 9.0012E-9 | 0.0044121 | 182.32    | 179120.0  | 887.21    | 4.68      | <a href="#">Details</a> |
| g__Achromobacter            | 9.0012E-9 | 0.0044121 | 180.84    | 80617.0   | 59745.0   | 4.68      | <a href="#">Details</a> |
| g__Shewanella               | 9.0013E-4 | 0.0044121 | 682.95    | 159400.0  | 220.15    | 4.69      | <a href="#">Details</a> |
| g__Hydrocarboniferibacter   | 9.0013E-3 | 0.0044121 | 130.79    | 888.7     | 5022.0    | 4.61      | <a href="#">Details</a> |
| g__Pseudocanthomonas        | 9.0014E-1 | 0.0044121 | 40.59     | 8926.1    | 204880.0  | 5.17      | <a href="#">Details</a> |
| g__Piscobacter              | 9.0019E-6 | 0.0046579 | 181.09    | 3249.1    | 99820.0   | 4.7       | <a href="#">Details</a> |
| g__Tetrasphaera             | 9.0021E-4 | 0.0050284 | 288.84    | 40038.0   | 358.37    | 3.61      | <a href="#">Details</a> |
| g__Cultobacterium           | 9.0023E-2 | 0.0000870 | 0.0       | 18307.0   | 300.48    | 3.06      | <a href="#">Details</a> |
| g__Pseudethnobacter         | 9.0024E-2 | 0.0061954 | 20911.0   | 18290.0   | 527.04    | 4.11      | <a href="#">Details</a> |
| g__Bryophyllum              | 9.0011E-9 | 0.0070223 | 268.61    | 5738.8    | 14204.0   | 3.84      | <a href="#">Details</a> |
| g__Morpho                   | 9.0041E-4 | 0.0095781 | 32968.0   | 24100.0   | 200.07    | 4.21      | <a href="#">Details</a> |
| g__Acetivora                | 9.0043E-6 | 0.010467  | 473.66    | 47217.0   | 738870.0  | 5.57      | <a href="#">Details</a> |
| g__Paracoccus               | 9.0090E-1 | 0.010467  | 2919.0    | 6632.1    | 0.0       | 3.62      | <a href="#">Details</a> |
| g__Pantoea                  | 9.0092E-4 | 0.010881  | 3473.0    | 21390.6   | 103900.0  | 4.7       | <a href="#">Details</a> |
| g__Variovorax               | 9.0095E-9 | 0.012614  | 124.0     | 14423.0   | 57724.0   | 4.45      | <a href="#">Details</a> |
| g__Altimonasium_haerzfeldii | 9.0010E-2 | 0.01518   | 224990.0  | 200020.0  | 18281.0   | 5.01      | <a href="#">Details</a> |
| g__Methylobacterium         | 9.0101E-1 | 0.018181  | 427.81    | 21900.0   | 180.22    | 4.04      | <a href="#">Details</a> |
| g__Skermanella              | 9.0195E-6 | 0.024171  | 1033.1    | 3110.1    | 0.0       | 3.19      | <a href="#">Details</a> |
| g__Halobacterium            | 9.0222E-7 | 0.027045  | 9493.0    | 8832.7    | 0.0       | 3.07      | <a href="#">Details</a> |
| tax__cognate                | 9.0235E-3 | 0.027589  | 7792180.0 | 5940000.0 | 4084000.0 | 6.25      | <a href="#">Details</a> |
| g__Delfia                   | 9.0302E-5 | 0.047898  | 85.388    | 9022.8    | 154850.0  | 4.89      | <a href="#">Details</a> |
| g__Pseudomonas              | 9.0333E-2 | 0.050904  | 52930.0   | 309200.0  | 442940.0  | 5.20      | <a href="#">Details</a> |
| g__Romboutkella             | 9.0381E-3 | 0.059103  | 1891.7    | 141.11    | 5219.5    | 3.4       | <a href="#">Details</a> |
| g__Stenochryseobacterium    | 9.0460E-4 | 0.058734  | 580.78    | 2478.2    | 175.89    | 3.23      | <a href="#">Details</a> |
| g__Nitrospira               | 9.0584E-7 | 0.07027   | 10303.7   | 5878.8    | 295.07    | 3.52      | <a href="#">Details</a> |
| g__Blastococcus             | 9.0618E-5 | 0.083703  | 880.11    | 1150.8    | 170.85    | 2.7       | <a href="#">Details</a> |
| g__Bellinobacterium         | 9.0738E-9 | 0.087314  | 30944.0   | 820.70    | 0.0       | 4.25      | <a href="#">Details</a> |
| g__Nimrodobacterium         | 9.0840E-3 | 0.10781   | 4880.0    | 1605.4    | 0.0       | 3.35      | <a href="#">Details</a> |
| g__Dasyatis                 | 9.0918E-3 | 0.11422   | 24825.0   | 11990.0   | 85040.0   | 4.48      | <a href="#">Details</a> |

**Table 7c: LDA analysis of bacterial genus according to the stage**

The table below shows at most 500 features ranked by their p values, with significant features highlighted in orange.

| Name        | Pvalues  | FDR     | 1       | 2       | 3       | 4       | 5       | LDA score | View                    |
|-------------|----------|---------|---------|---------|---------|---------|---------|-----------|-------------------------|
| denovo20023 | 0.099973 | 0.00031 | 7191.9  | 0.0     | 9209.4  | 0.0     | 31263   | 2.66      | <a href="#">Details</a> |
| denovo2056  | 0.14558  | 0.00031 | 2008.3  | 5629.4  | 956.11  | 2210.6  | 2503.4  | 3.37      | <a href="#">Details</a> |
| denovo28732 | 0.1064   | 0.00031 | 2049.0  | 2024.0  | 502.74  | 2348.2  | 302.21  | 3.11      | <a href="#">Details</a> |
| denovo27093 | 0.19013  | 0.00031 | 10167.0 | 40746.0 | 5015.9  | 12853.0 | 3337.9  | 4.27      | <a href="#">Details</a> |
| denovo7813  | 0.18864  | 0.00031 | 539.75  | 1385.1  | 1402.6  | 36297.0 | 2342.8  | 4.26      | <a href="#">Details</a> |
| denovo18480 | 0.10329  | 0.00031 | 0.0     | 57507.0 | 10320.0 | 5285.8  | 38108.0 | 4.96      | <a href="#">Details</a> |
| denovo22017 | 0.21466  | 0.00031 | 0.0     | 7254.2  | 0.0     | 6951.4  | 11101.0 | 2.74      | <a href="#">Details</a> |
| denovo18947 | 0.21939  | 0.00031 | 525.92  | 346.55  | 2187.5  | 856.34  | 804.31  | 2.96      | <a href="#">Details</a> |
| denovo13631 | 0.22771  | 0.00031 | 5000.0  | 893.78  | 75.844  | 906.92  | 2160.0  | 3.39      | <a href="#">Details</a> |
| denovo24124 | 0.2291   | 0.00031 | 2642.3  | 4626.4  | 13450.0 | 64842.0 | 5985.4  | 4.49      | <a href="#">Details</a> |
| denovo123   | 0.25136  | 0.00031 | 1779.5  | 305.17  | 335.21  | 732.46  | 892.44  | 2.87      | <a href="#">Details</a> |
| denovo9511  | 0.25476  | 0.00031 | 36845.0 | 1726.9  | 4269.4  | 0.0     | 637.05  | 4.27      | <a href="#">Details</a> |
| denovo4958  | 0.25945  | 0.00031 | 1436.0  | 1701.1  | 1290.5  | 2280.4  | 358.84  | 2.96      | <a href="#">Details</a> |
| denovo3890  | 0.27502  | 0.00031 | 4826.2  | 999.44  | 15220.0 | 4501.9  | 15942.0 | 3.87      | <a href="#">Details</a> |
| denovo27114 | 0.28113  | 0.00031 | 4349.3  | 7886.0  | 4761.0  | 5233.8  | 23137.0 | 3.97      | <a href="#">Details</a> |
| denovo31045 | 0.28676  | 0.00031 | 6145.7  | 5667.2  | 2789.7  | 4551.9  | 1395.6  | 3.38      | <a href="#">Details</a> |
| denovo9207  | 0.29528  | 0.00031 | 1342.6  | 1636.8  | 1264.7  | 699.89  | 827.33  | 2.80      | <a href="#">Details</a> |
| denovo23495 | 0.29543  | 0.00031 | 1607.3  | 554.72  | 4262.5  | 1475.0  | 1031.4  | 3.27      | <a href="#">Details</a> |
| denovo8574  | 0.30623  | 0.00031 | 640.01  | 119.52  | 1517.7  | 1223.0  | 454.54  | 2.65      | <a href="#">Details</a> |
| denovo21341 | 0.30825  | 0.00031 | 15515.0 | 460.07  | 31809.0 | 35927.0 | 47021.0 | 4.57      | <a href="#">Details</a> |

**Table 7d: LDA analysis of fungal genus according to the site**

The table below shows at most 500 features ranked by their p values, with significant features highlighted in orange.

| Name               | Pvalues   | FDR     | Remote    | Urban     | LDA score | View                    |
|--------------------|-----------|---------|-----------|-----------|-----------|-------------------------|
| g_Meyerozyma       | 0.0033641 | 0.21194 | 1355.0    | 25517.0   | 4.08      | <a href="#">Details</a> |
| g_Trichoderma      | 0.014795  | 0.41881 | 7476.5    | 29273.0   | 4.04      | <a href="#">Details</a> |
| g_Gibberella       | 0.022311  | 0.41881 | 32626.0   | 21488.0   | -3.75     | <a href="#">Details</a> |
| g_Pseudallescheria | 0.028591  | 0.41881 | 9884.7    | 1027.3    | -3.65     | <a href="#">Details</a> |
| g_Alternaria       | 0.04125   | 0.4443  | 1096000.0 | 625170.0  | -5.37     | <a href="#">Details</a> |
| g_Lewia            | 0.044348  | 0.4443  | 6722.0    | 2222.7    | -3.35     | <a href="#">Details</a> |
| g_Penicillium      | 0.049366  | 0.4443  | 34232.0   | 193010.0  | 4.9       | <a href="#">Details</a> |
| g_Malassezia       | 0.069223  | 0.4875  | 31936.0   | 63611.0   | 4.2       | <a href="#">Details</a> |
| g_Mucor            | 0.069642  | 0.4875  | 46024.0   | 101250.0  | 4.44      | <a href="#">Details</a> |
| g_Scoodosporium    | 0.084767  | 0.53403 | 41126.0   | 9310.6    | -4.2      | <a href="#">Details</a> |
| g_Meira            | 0.11193   | 0.57755 | 419.62    | 2878.4    | 3.09      | <a href="#">Details</a> |
| g_Gymnascella      | 0.11193   | 0.57755 | 7349.1    | 688.23    | -3.52     | <a href="#">Details</a> |
| g_Myrothecium      | 0.13512   | 0.57755 | 15709.0   | 7348.6    | -3.62     | <a href="#">Details</a> |
| g_Exophiala        | 0.13897   | 0.57755 | 35724.0   | 33986.0   | -2.04     | <a href="#">Details</a> |
| g_unidentified     | 0.15093   | 0.57755 | 2419000.0 | 1358800.0 | -5.72     | <a href="#">Details</a> |
| g_Walleimia        | 0.15585   | 0.57755 | 6005.1    | 1382.1    | -3.36     | <a href="#">Details</a> |
| g_Rhodotorula      | 0.15585   | 0.57755 | 83378.0   | 742.44    | -4.62     | <a href="#">Details</a> |
| g_Erysiphe         | 0.19852   | 0.65908 | 2817.7    | 3304.2    | 2.39      | <a href="#">Details</a> |
| Nnt_Assigned       | 0.19878   | 0.65908 | 2713200.0 | 3651200.0 | 5.67      | <a href="#">Details</a> |

**Table S7e: LDA analysis of fungal genus according to the season**

The table below shows at most 500 features ranked by their p values, with significant features highlighted in orange.

| Name               | Pvalues  | FDR     | Spring    | Summer    | Winter    | LDAscore | View                    |
|--------------------|----------|---------|-----------|-----------|-----------|----------|-------------------------|
| g_Gloeotinia       | 0.001995 | 0.12568 | 39.89     | 11733.0   | 493900.0  | 5.39     | <a href="#">Details</a> |
| g_Fomitopsis       | 0.019938 | 0.30911 | 1448.9    | 204.75    | 77758.0   | 4.59     | <a href="#">Details</a> |
| g_Mortierella      | 0.021994 | 0.30911 | 153930.0  | 0.0       | 72.249    | 4.89     | <a href="#">Details</a> |
| g_Blumeria         | 0.023584 | 0.30911 | 35182.0   | 162.54    | 0.0       | 4.25     | <a href="#">Details</a> |
| g_Chaetomium       | 0.024533 | 0.30911 | 17383.0   | 12099.0   | 58882.0   | 4.37     | <a href="#">Details</a> |
| g_Besuveria        | 0.04735  | 0.49717 | 22123.0   | 51171.0   | 11788.0   | 4.29     | <a href="#">Details</a> |
| g_Ustilago         | 0.064598 | 0.55144 | 3489.9    | 310.45    | 0.0       | 3.24     | <a href="#">Details</a> |
| g_Exophiala        | 0.070025 | 0.55144 | 23410.0   | 66996.0   | 8169.4    | 4.47     | <a href="#">Details</a> |
| g_Scopulariopsis   | 0.11401  | 0.72661 | 1077.8    | 0.0       | 934.57    | 2.73     | <a href="#">Details</a> |
| g_Eurotium         | 0.12305  | 0.72661 | 39733.0   | 31402.0   | 113250.0  | 4.61     | <a href="#">Details</a> |
| g_Lecanicillium    | 0.12756  | 0.72661 | 7863.1    | 17833.0   | 18480.0   | 3.73     | <a href="#">Details</a> |
| g_Stachybotrys     | 0.1478   | 0.72661 | 5245.2    | 914.31    | 4983.8    | 3.34     | <a href="#">Details</a> |
| g_Cochliobolus     | 0.16421  | 0.72661 | 28852.0   | 43930.0   | 94745.0   | 4.52     | <a href="#">Details</a> |
| g_Aureobasidium    | 0.17237  | 0.72661 | 76667.0   | 35998.0   | 46010.0   | 4.31     | <a href="#">Details</a> |
| g_Botryotinia      | 0.173    | 0.72661 | 20892.0   | 3595.7    | 5249.8    | 3.94     | <a href="#">Details</a> |
| g_Coprinellus      | 0.18701  | 0.73636 | 2620.1    | 40.636    | 505.74    | 3.11     | <a href="#">Details</a> |
| g_Cladosporium     | 0.21813  | 0.78219 | 285040.0  | 186710.0  | 452920.0  | 5.12     | <a href="#">Details</a> |
| g_Pseudallescheria | 0.23574  | 0.78219 | 2958.7    | 1116.0    | 15488.0   | 3.86     | <a href="#">Details</a> |
| g_Cryptococcus     | 0.24545  | 0.78219 | 1218900.0 | 1254200.0 | 1161800.0 | 4.66     | <a href="#">Details</a> |

**Table S7f: LDA analysis of fungal genus according to the stage**

The table below shows at most 500 features ranked by their p values, with significant features highlighted in orange.

| Name             | Pvalues  | FDR     | 1         | 2        | 3         | 4         | 5         | 7    | View                    |
|------------------|----------|---------|-----------|----------|-----------|-----------|-----------|------|-------------------------|
| g_Gladorrhinum   | 0.02582  | 0.55038 | 837.32    | 0.0      | 0.0       | 32442.0   | 0.0       | 4.21 | <a href="#">Details</a> |
| g_Aureobasidium  | 0.041962 | 0.55038 | 99423.0   | 15672.0  | 55025.0   | 56744.0   | 9946.5    | 4.65 | <a href="#">Details</a> |
| g_Cercospora     | 0.045577 | 0.55038 | 0.0       | 116530.0 | 0.0       | 0.0       | 11143.0   | 4.77 | <a href="#">Details</a> |
| g_Besuveria      | 0.060552 | 0.55038 | 11627.0   | 65875.0  | 34899.0   | 16015.0   | 46920.0   | 4.5  | <a href="#">Details</a> |
| g_Candida        | 0.088018 | 0.55038 | 163850.0  | 479090.0 | 175530.0  | 788550.0  | 38081.0   | 5.59 | <a href="#">Details</a> |
| g_Setosphaeria   | 0.088309 | 0.55038 | 1098.2    | 38735.0  | 6892.5    | 22841.0   | 56750.0   | 4.44 | <a href="#">Details</a> |
| g_Pyrenophora    | 0.092833 | 0.55038 | 3029.9    | 123.01   | 4289.8    | 0.0       | 0.0       | 3.92 | <a href="#">Details</a> |
| g_Cerrena        | 0.096673 | 0.55038 | 9922.2    | 48848.0  | 80243.0   | 2303.2    | 7400.0    | 4.6  | <a href="#">Details</a> |
| g_Coprinellus    | 0.0983   | 0.55038 | 3833.1    | 0.0      | 723.92    | 0.0       | 0.0       | 3.28 | <a href="#">Details</a> |
| g_Kodamaea       | 0.098683 | 0.55038 | 9402.9    | 6173.4   | 31416.0   | 9047.6    | 0.0       | 4.2  | <a href="#">Details</a> |
| g_Schizophyllum  | 0.1009   | 0.55038 | 94516.0   | 182010.0 | 545010.0  | 17525.0   | 33719.0   | 5.44 | <a href="#">Details</a> |
| g_Doratomyces    | 0.10483  | 0.55038 | 4067.7    | 32018.0  | 5251.4    | 25079.0   | 3786.0    | 4.19 | <a href="#">Details</a> |
| g_Alternaria     | 0.12504  | 0.56168 | 1256600.0 | 352250.0 | 769490.0  | 892410.0  | 515480.0  | 5.75 | <a href="#">Details</a> |
| g_Microascus     | 0.13512  | 0.56168 | 837.32    | 0.0      | 14938.0   | 9675.9    | 0.0       | 3.87 | <a href="#">Details</a> |
| g_Fusarium       | 0.1444   | 0.56168 | 231630.0  | 171260.0 | 51884.0   | 78716.0   | 92084.0   | 4.98 | <a href="#">Details</a> |
| g_Scopulariopsis | 0.15391  | 0.56168 | 1217.7    | 0.0      | 1542.4    | 0.0       | 0.0       | 2.89 | <a href="#">Details</a> |
| g_Lewia          | 0.15716  | 0.56168 | 1691.3    | 5476.4   | 2682.4    | 4097.2    | 509.27    | 3.96 | <a href="#">Details</a> |
| g_Blumeria       | 0.16048  | 0.56168 | 4856.4    | 27241.0  | 0.0       | 25471.0   | 0.0       | 4.3  | <a href="#">Details</a> |
| g_unidentified   | 0.1836   | 0.60877 | 2273700.0 | 940860.0 | 1618600.0 | 1704500.0 | 1206100.0 | 6.25 | <a href="#">Details</a> |
| g_Chaetomium     | 0.19692  | 0.62028 | 22436.0   | 0.0      | 8263.5    | 11249.0   | 50037.0   | 4.7  | <a href="#">Details</a> |
