# Supplementary material for: Spatio-temporal variations in bacterial and fungal community associated with dust aerosol in Kuwait
Source: PubMed Central journal article supplement (PMC7644028; doi:10.1371/journal.pone.0241283), 2020-11-05
Supplement: pone.0241283.s005.pdf [file pone.0241283.s005.pdf]

**Table S8a: Seasonal Diversity of predominant bacterial genera**

| Genus            | Autumn;Remote  | Autumn;Urban   | Spring;Remote  | Spring;Urban   | Summer;Remote  | Summer;Urban   |
|------------------|----------------|----------------|----------------|----------------|----------------|----------------|
| g__Acidovorax    | 0.09525        | <b>0.04074</b> | 0.00015        | 0.00002        | 0.01352        | 0.00000        |
| g__Allorhizobium | 0.00055        | 0.00083        | 0.03153        | 0.01672        | 0.03114        | 0.01784        |
| g__Brevundimonas | 0.07454        | 0.01014        | <b>0.24163</b> | <b>0.04969</b> | <b>0.28571</b> | <b>0.09455</b> |
| g__Halomonas     | 0.00028        | 0.00009        | 0.00028        | 0.00011        | 0.00162        | 0.05080        |
| g__Massilia      | 0.00098        | 0.00000        | 0.01395        | 0.01211        | 0.05148        | 0.04559        |
| g__Mesorhizobium | 0.00896        | 0.01014        | 0.00893        | 0.00863        | 0.00505        | 0.02094        |
| g__Pseudomonas   | 0.06255        | 0.01294        | 0.00315        | 0.00867        | 0.07157        | 0.00617        |
| g__Sphingobium   | <b>0.19738</b> | 0.03239        | 0.00000        | 0.00002        | 0.00061        | 0.00000        |
| g__Sphingomonas  | 0.14458        | 0.00408        | 0.00003        | 0.00014        | 0.00242        | 0.00664        |
| g__Sphingopyxis  | 0.02545        | 0.01748        | 0.00003        | 0.00005        | 0.04848        | 0.05915        |
| Not_Assigned     | 0.15795        | 0.78244        | 0.61219        | 0.89675        | 0.43895        | 0.58624        |
| Others           | 0.23154        | 0.08873        | 0.08812        | 0.00709        | 0.04946        | 0.11209        |

Figures highlighted in bold depict the dominant forms

**Table S8b: Seasonal Diversity of predominant fungal genera**

| Genus            | Autumn;Remote  | Autumn;Urban   | Spring;Remote  | Spring;Urban   | Summer;Remote  | Summer;Urban   |
|------------------|----------------|----------------|----------------|----------------|----------------|----------------|
| g__Alternaria    | 0.15622        | 0.05029        | <b>0.10175</b> | 0.08337        | <b>0.08113</b> | 0.03566        |
| g__Aspergillus   | 0.05768        | 0.05727        | 0.07798        | 0.05365        | 0.03544        | 0.13380        |
| g__Candida       | 0.01033        | 0.01470        | 0.05470        | 0.01431        | 0.06727        | 0.01557        |
| g__Cladosporium  | 0.03578        | 0.05760        | 0.02047        | 0.03389        | 0.02563        | 0.01041        |
| g__Cryptococcus  | <b>0.17672</b> | 0.02641        | 0.06106        | <b>0.15711</b> | 0.07168        | <b>0.19382</b> |
| g__Fusarium      | 0.02750        | 0.00663        | 0.00880        | 0.01344        | 0.00886        | 0.01562        |
| g__Gloeotinia    | 0.00608        | <b>0.11430</b> | 0.00000        | 0.00000        | 0.00200        | 0.00002        |
| g__Penicillium   | 0.00219        | 0.04950        | 0.00652        | 0.00861        | 0.00181        | 0.01700        |
| g__Schizophyllum | 0.04146        | 0.00066        | 0.04696        | 0.00292        | 0.00438        | 0.00922        |
| g__unidentified  | 0.10383        | 0.19513        | 0.27920        | 0.13105        | 0.31550        | 0.10965        |
| Not_Assigned     | 0.27258        | 0.33681        | 0.23071        | 0.38583        | 0.30320        | 0.35071        |
| Others           | 0.10964        | 0.09070        | 0.11185        | 0.11583        | 0.08309        | 0.10851        |

Figures highlighted in bold depict the dominant forms
