# Supplementary material for: Spatio-temporal variations in bacterial and fungal community associated with dust aerosol in Kuwait
Source: PubMed Central journal article supplement (PMC7644028; doi:10.1371/journal.pone.0241283), 2020-11-05
Supplement: pone.0241283.s007.pdf [file pone.0241283.s007.pdf]

**Supplementary File S4: Raw sequence quality and filtering parameters for OTU picking**

**Table S4a. Basic Sequencing Statistics and QIIME cut-off**

| Description                                   | Bacterial     | Fungal         |
|-----------------------------------------------|---------------|----------------|
| Total Paired end Reads                        | 38343-87060bp | 82271-155807bp |
| GC Content                                    | 52.41-54.46%  | 49.65-55.91%   |
| Phred Score                                   | 29.63-34-20   | 30.91-35.79    |
| Phred Quality Distribution >= Q30             | 63.98-84.82%  | 69.85-90.54    |
| Total Consensus Sequences                     | 27834-65124   | 33904-84882    |
| Consensus Sequences after Chimera Removal     | 14470-53121   | 32620-83666    |
| Total Pre-processed Consensus                 | 558721        | 1080482        |
| Total OTUs Picked                             | 31269         | 9312           |
| Total Filtered OTUs(<5 reads)                 | 29147         | 7132           |
| Total Filtered OTUs(after filtering <5 reads) | 2122          | 2180           |

**Table S4b: Default parameters set in MicroBiomeAnalyst**

| Description               | Bacterial | Fungal  |
|---------------------------|-----------|---------|
| OTUs in Input file        | 2115      | 2180    |
| OTUs with $\geq 2$ counts | 1874      | 1334    |
| Total read counts         | 517727    | 1033343 |
| Average counts per sample | 25886     | 51667   |
| Maximum counts per sample | 51453     | 80267   |
| Minimum counts per sample | 11766     | 30277   |
| Low Count Filter          | 4         | 4       |
| Prevalence                | 20%       | 20%     |
| Inter quartile range      | 10%       | 10%     |
| Total OTUs retained       | 224       | 371     |

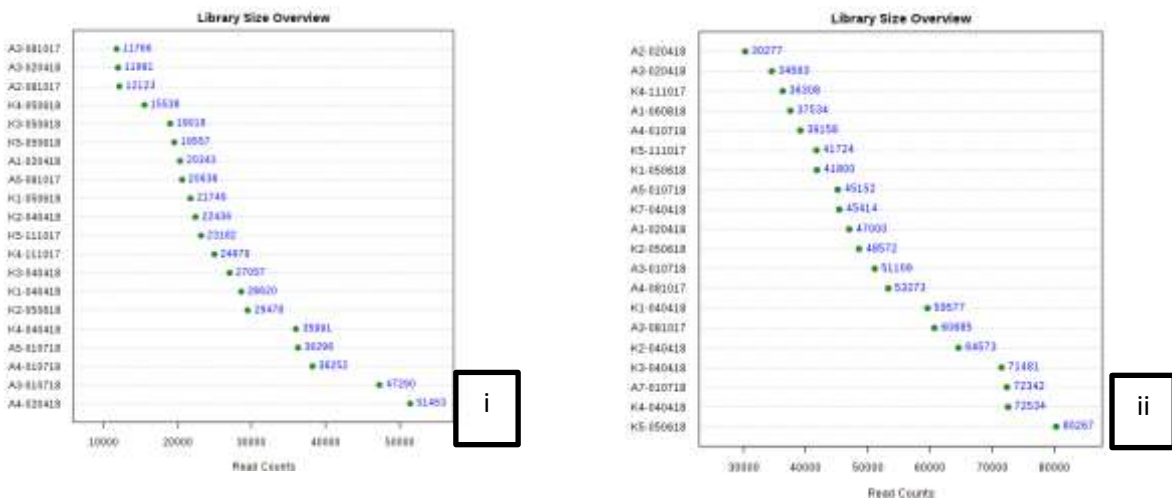

**Figure S4a: Library Size Overview of (i) Bacterial (ii) Fungal Sequences**

**Data Rarefaction:**

We performed the rarefaction to bring all the samples at a single sequence level. For bacterial samples the sequence size was normalized at 10898 and for fungal samples it was rarified at 27098. For the former we obtained a plateau beginning at 5000 whereas the plateau began at 10000 in case of fungal sequences. It was observed that beyond these levels there was little or negligible increase in species richness.

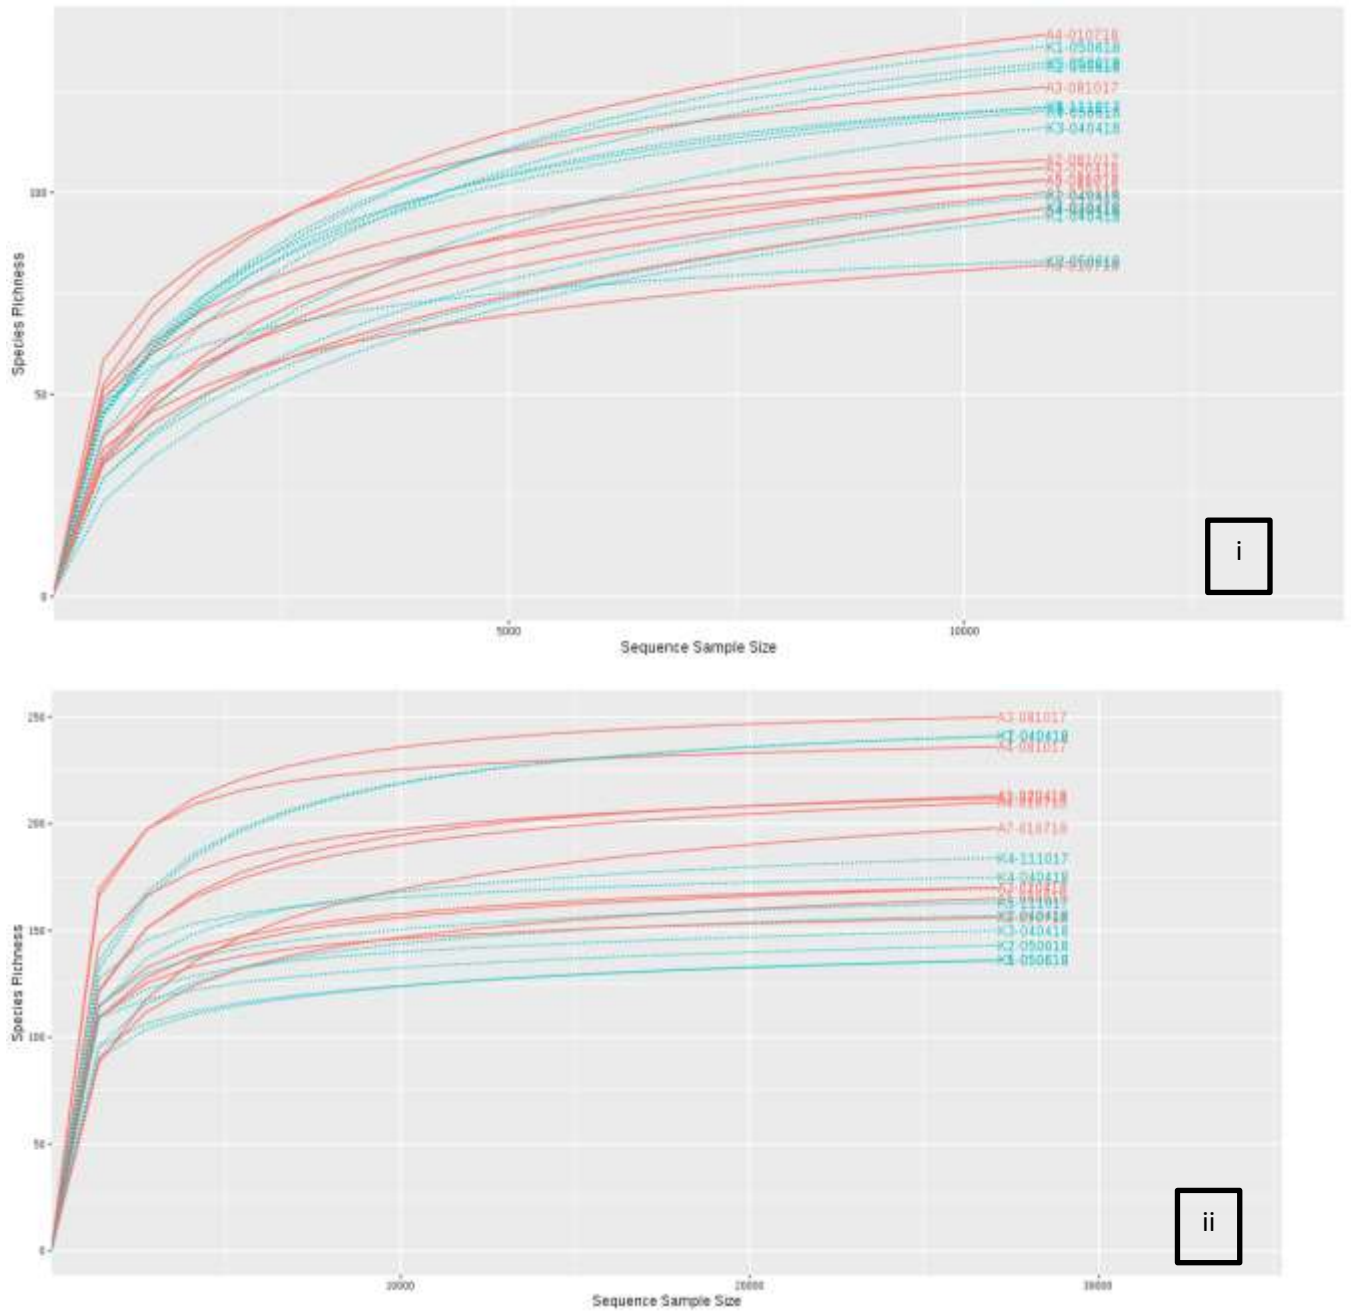

Figure S4b: Data Rarefaction Curves of (i) Bacterial and (ii) Fungal sequences
